# Supplementary material for: Antihypertensive Effects of Polyphenolic Extract from Korean Red Pine (Pinus densiflora Sieb. et Zucc.) Bark in Spontaneously Hypertensive Rats
Source: PubMed Central journal article supplement (PMC7222369; doi:10.3390/antiox9040333), 2020-04-19
Supplement: antioxidants-09-00333-s001.pdf [file antioxidants-09-00333-s001.pdf]

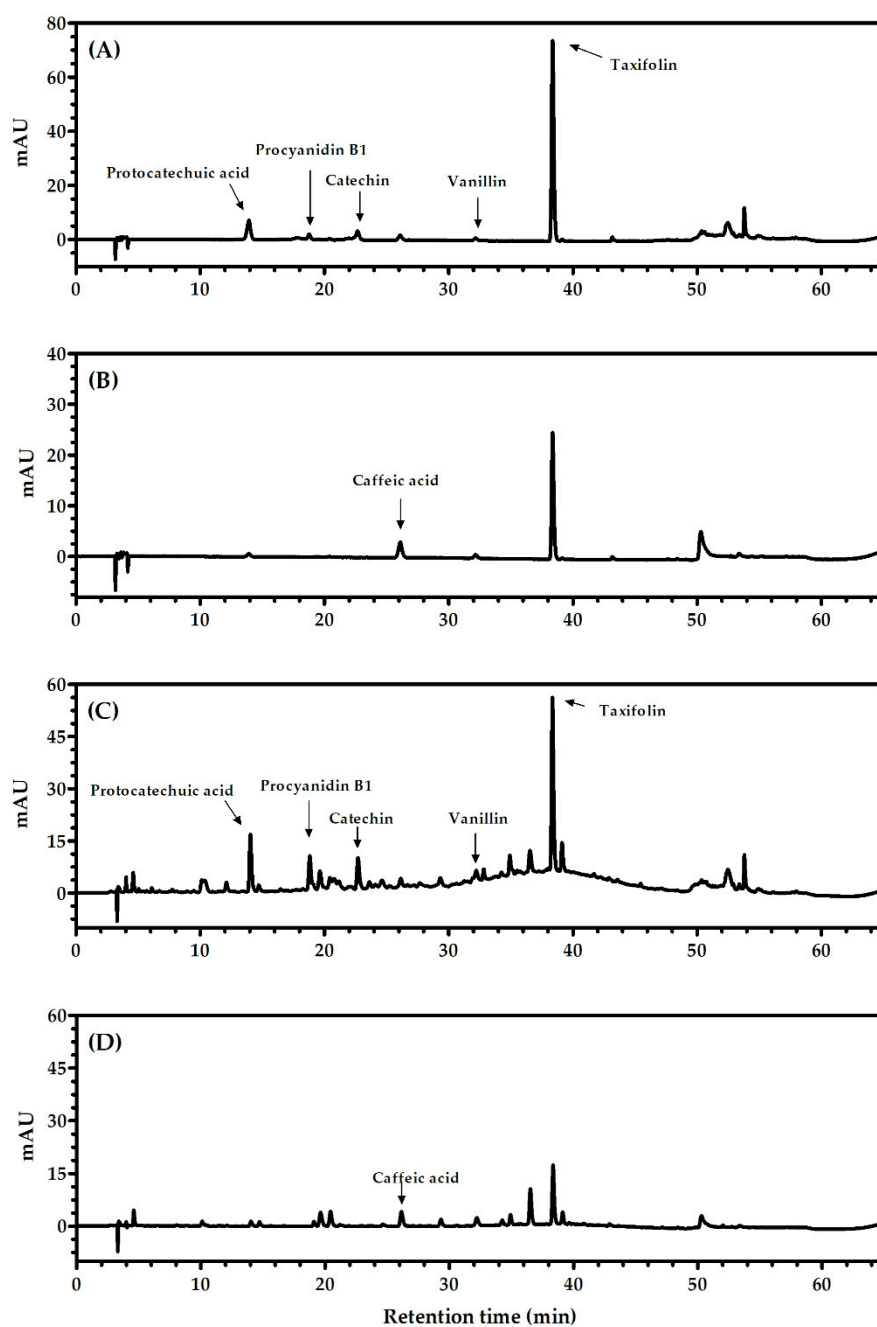

**Supplementary Figure S1.** High-performance liquid chromatography traces of mixture of standards at 280 nm (A) and 320 nm (B), and Korean red pine (*Pinus densiflora* Sieb. et Zucc.) bark extract at 280 nm (C) and 320 nm (D).
